# Supplementary material for: A longitudinal and transancestral analysis of DNA methylation patterns and disease activity in lupus patients
Source: JCI journal article supplement (doi:10.1172/jci.insight.143654), 2020-10-27
Supplement: sd1 [file 1]

**Supplemental Figure 1.** Networks of genes with hypomethylated (green shapes) and hypermethylated (red shapes) CpG sites in African-American compared to European-American lupus patients. White shapes represent genes included in the network by IPA through their relationship to the input genes. Green-red shapes included both hypo- and hypermethylated CpG sites. Dashed and solid lines represent indirect and direct interactions, respectively.

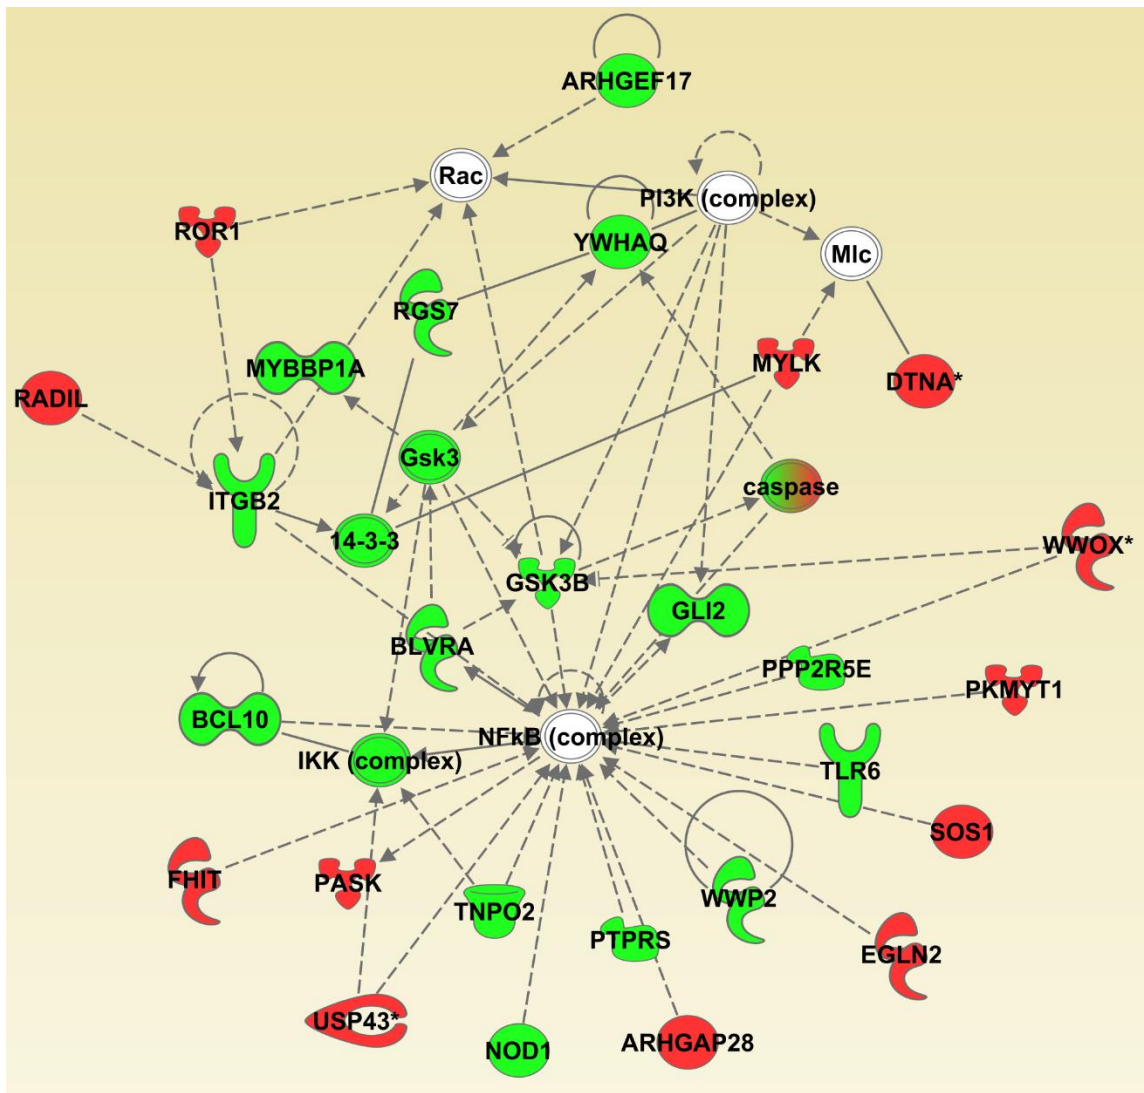

**Supplemental Figure 2:** Networks of genes with hypomethylated (green shapes) and hypermethylated (red shapes) CpG sites in African-American compared to European-American lupus patients. White shapes represent genes included in the network by IPA through their relationship to the input genes. Dashed and solid lines represent indirect and direct interactions, respectively.

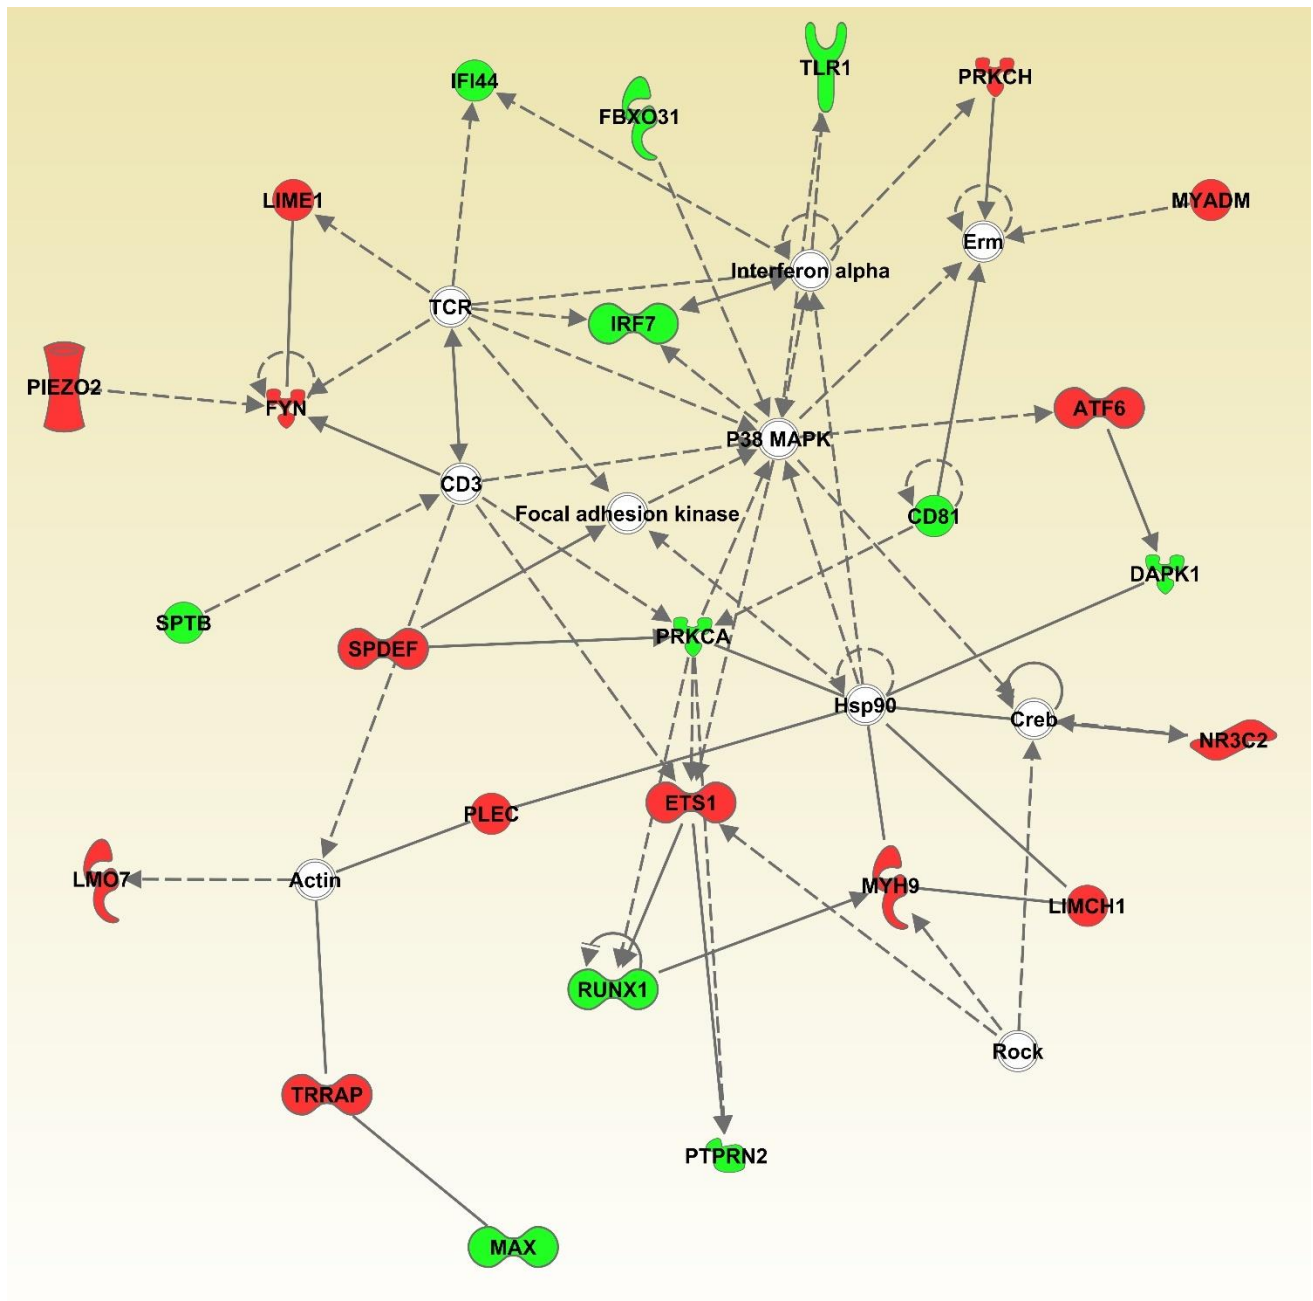

**Supplementary Figure 3:** SLEDAI score distribution in African-American and European-American lupus patients at initial sample collection.

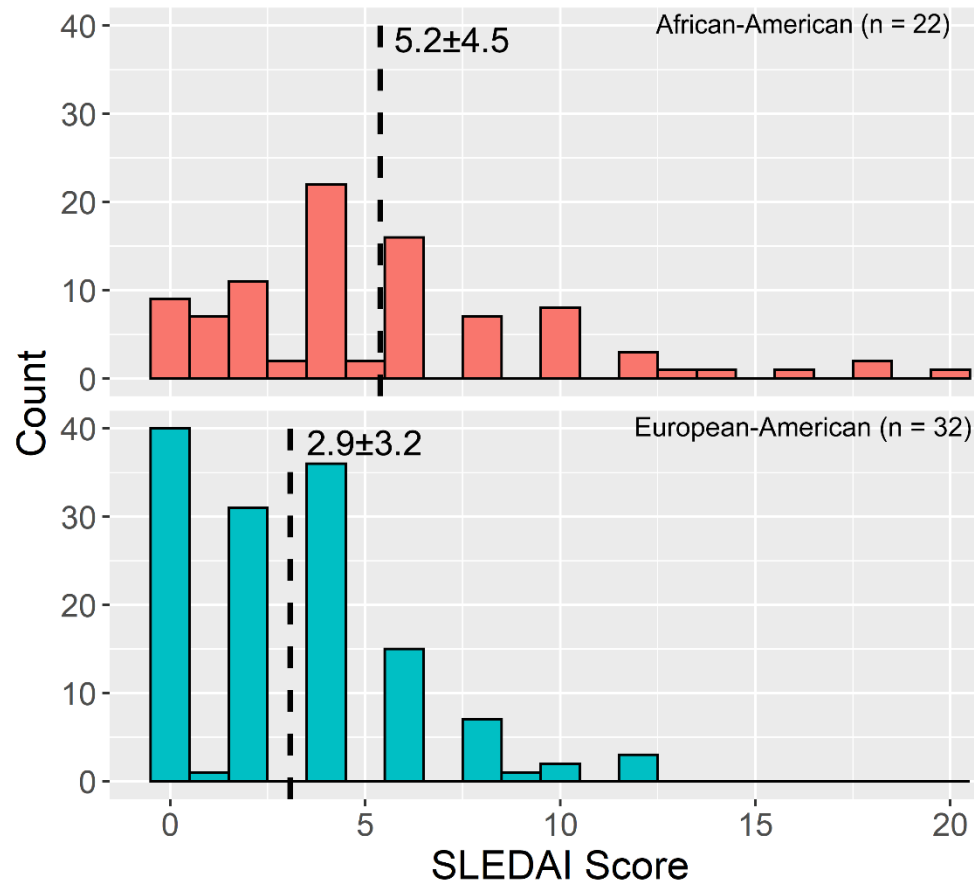

**Supplementary Figure 4.** Dot plot showing correlation of mean DNA methylation for 71 neutrophil-specific probes from purified cell populations in Salas *et al.*(1) and mean DNA methylation of the same probes in isolated granulocytes in our lupus cohort (n = 229). Pearson's product-moment correlation test had a  $r = 0.996$  and P-value  $< 2.2E-16$ .

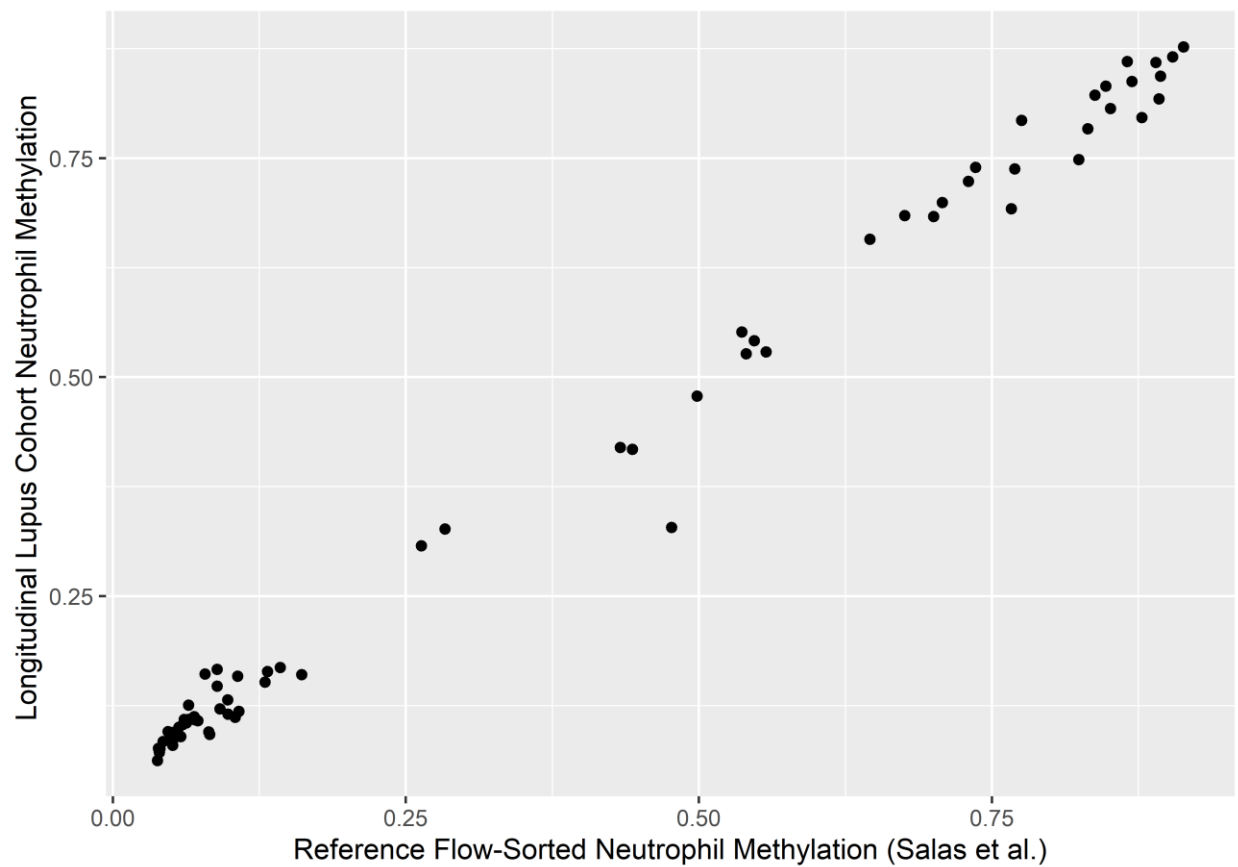

**Supplementary Figure 5:** Dot plot of top two genotype principal components. Grey squares represent European-American lupus patients and black dots represent African-American lupus patients.

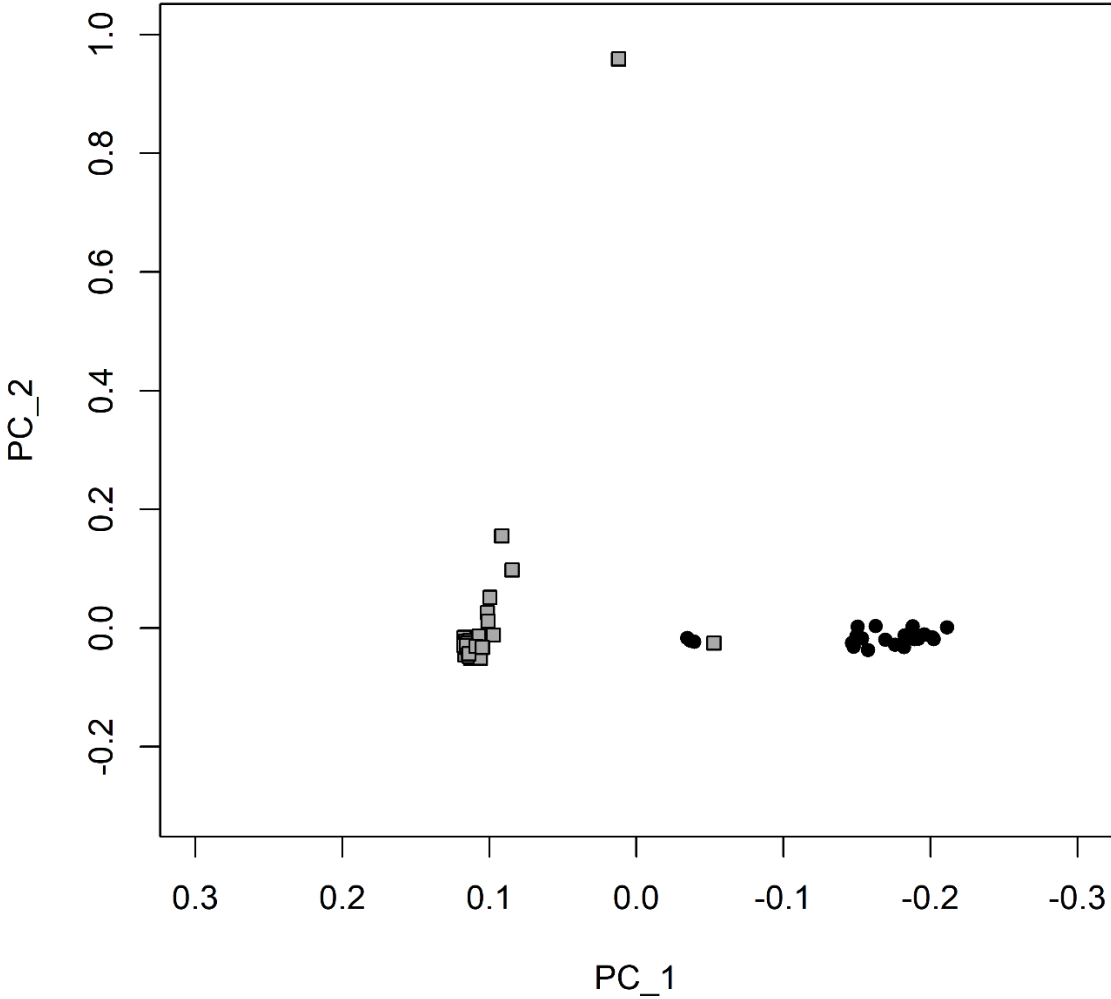

## Reference

1. Salas LA, Koestler DC, Butler RA, Hansen HM, Wiencke JK, Kelsey KT, et al. An optimized library for reference-based deconvolution of whole-blood biospecimens assayed using the Illumina HumanMethylationEPIC BeadArray. *Genome Biol.* 2018;19(1):64.
